# Supplementary material for: Construction of an MLR-QSAR Model Based on Dietary Flavonoids and Screening of Natural α-Glucosidase Inhibitors
Source: MDPI journal article supplement (doi:10.3390/foods11244046), 2022-12-14
Supplement: s1 [file s1]

## Supplementary File

**Table S1** Equations presented in the research paper

| Sl. No. | Equation                                                                                          |
|---------|---------------------------------------------------------------------------------------------------|
| 1       | $R^2 = 1 - \frac{SS_{res}}{SS_{tot}} = 1 - \frac{\sum_i (y_i - f_i)^2}{\sum_i (y_i - \bar{y})^2}$ |
| 2       | $\text{Adjusted } R^2 = 1 - \frac{PRESS / df_e}{SS_{tot} / df_t}$                                 |
| 3       | $RSS = \sum_i (y_i - f_i)^2$                                                                      |
| 4       | $PRESS = \sum_{i=1}^n (y_i - f_{i/i})^2$                                                          |
| 5       | $SDEC = \sqrt{\frac{RSS}{n}}$                                                                     |
| 6       | $SDEP = \sqrt{\frac{PRESS}{n}}$                                                                   |
| 7       | $MAE(X, h) = \frac{1}{m} \sum_{i=1}^m  h(x_i) - y_i $                                             |
| 8       | $MSE = \frac{1}{m} \sum_{i=1}^m (y_i - \hat{y}_i)^2$                                              |

Note:  $y_i$  ,  $f_i$  ,  $\bar{y}$  are the experimental, predicted, and average values, respectively.  $SS_{res}$  is the sum of squares of residuals, also called the residual sum of squares.  $SS_{tot}$  is the total sum of squares.  $df_e$  is the degree of freedom of the underlying overall error variance estimate n-p-1.  $df_t$  is the degree of freedom n-1 of the overall variance estimate of the dependent variable.

**Table S2** 2D-MLR-QSAR prediction of potential natural  $\alpha$ -glucosidase inhibitors

| name       | QED    | MW      | ALOGP  | HBA | HBD | ROTB | PSA    | AROM | ALERTS | smile                                                     |
|------------|--------|---------|--------|-----|-----|------|--------|------|--------|-----------------------------------------------------------|
| 5281605    | 0.5911 | 270.24  | 2.5768 | 5   | 3   | 1    | 90.9   | 3    | 1      | <chem>O=c1cc(-c2ccccc2)oc2cc(O)c(O)c(O)c12</chem>         |
| 5281654    | 0.5721 | 316.265 | 2.291  | 7   | 4   | 2    | 120.36 | 3    | 0      | <chem>COc1cc(-c2oc3cc(O)cc(O)c3c(=O)c2O)ccc1O</chem>      |
| 5280445    | 0.5106 | 286.239 | 2.2824 | 6   | 4   | 1    | 111.13 | 3    | 1      | <chem>O=c1cc(-c2ccc(O)c(O)c2)oc2cc(O)cc(O)c12</chem>      |
| CNP0401811 | 0.6769 | 330.292 | 2.594  | 7   | 3   | 3    | 109.36 | 3    | 0      | <chem>COc1cc(-c2oc3cc(O)cc(OC)c3c(=O)c2O)ccc1O</chem>     |
| CNP0229011 | 0.6769 | 330.292 | 2.594  | 7   | 3   | 3    | 109.36 | 3    | 0      | <chem>COc1ccc(-c2oc3cc(O)cc(O)c3c(=O)c2O)cc1OC</chem>     |
| CNP0237570 | 0.6769 | 330.292 | 2.594  | 7   | 3   | 3    | 109.36 | 3    | 0      | <chem>COc1cc(O)c2c(=O)c(O)c(-c3ccc(O)c(OC)c3)oc2c1</chem> |
| CNP0137967 | 0.5721 | 316.265 | 2.291  | 7   | 4   | 2    | 120.36 | 3    | 0      | <chem>COc1ccc(-c2oc3cc(O)cc(O)c3c(=O)c2O)cc1O</chem>      |
| CNP0304960 | 0.6769 | 330.292 | 2.594  | 7   | 3   | 3    | 109.36 | 3    | 0      | <chem>COc1cc(-c2oc3cc(O)cc(O)c3c(=O)c2OC)ccc1O</chem>     |
| CNP0070352 | 0.6723 | 314.293 | 2.8938 | 6   | 3   | 2    | 100.13 | 3    | 0      | <chem>COc1cc(-c2oc3cc(O)cc(O)c3c(=O)c2C)ccc1O</chem>      |
| CNP0085812 | 0.6567 | 315.257 | 1.659  | 7   | 3   | 2    | 123.19 | 3    | 0      | <chem>COc1cc(-c2oc3cc([O-])cc(O)c3c(=O)c2O)ccc1O</chem>   |
| CNP0251015 | 0.6318 | 270.24  | 2.5768 | 5   | 3   | 1    | 90.9   | 3    | 0      | <chem>O=c1cc(-c2ccc(O)cc2)oc2cc(O)cc(O)c12</chem>         |
| CNP0290456 | 0.5106 | 286.239 | 2.2824 | 6   | 4   | 1    | 111.13 | 3    | 1      | <chem>O=c1cc(-c2ccc(O)cc2)oc2cc(O)c(O)c12</chem>          |
| CNP0311055 | 0.6388 | 284.267 | 2.8852 | 5   | 3   | 1    | 90.9   | 3    | 0      | <chem>Cc1cc(-c2cc(=O)c3c(O)cc(O)cc3o2)ccc1O</chem>        |

|            |        |         |        |   |   |   |        |   |   |                                                            |
|------------|--------|---------|--------|---|---|---|--------|---|---|------------------------------------------------------------|
| CNP0303945 | 0.626  | 285.231 | 1.6504 | 6 | 3 | 1 | 113.96 | 3 | 0 | <chem>O=c1cc(-c2ccc([O-])c(O)c2)oc2cc(O)cc(O)c12</chem>    |
| CNP0226932 | 0.7107 | 268.268 | 3.1796 | 4 | 2 | 1 | 70.67  | 3 | 0 | <chem>Cc1c(O)cc2oc(-c3ccccc3)cc(=O)c2c1O</chem>            |
| CNP0305733 | 0.7107 | 268.268 | 3.1796 | 4 | 2 | 1 | 70.67  | 3 | 0 | <chem>Cc1cc(O)c2c(=O)cc(-c3ccc(O)cc3)oc2c1</chem>          |
| CNP0149125 | 0.6549 | 254.241 | 2.8712 | 4 | 2 | 1 | 70.67  | 3 | 1 | <chem>O=c1cc(-c2ccccc2)oc2ccc(O)c(O)c12</chem>             |
| CNP0394762 | 0.6289 | 300.266 | 2.5854 | 6 | 3 | 2 | 100.13 | 3 | 1 | <chem>COc1cc(O)c2c(=O)cc(-c3ccc(O)c(O)c3)oc2c1</chem>      |
| CNP0292269 | 0.5459 | 286.239 | 2.2824 | 6 | 4 | 1 | 111.13 | 3 | 0 | <chem>O=c1c(O)c(-c2ccc(O)cc2)oc2cc(O)cc(O)c12</chem>       |
| CNP0102699 | 0.514  | 300.266 | 2.5908 | 6 | 4 | 1 | 111.13 | 3 | 1 | <chem>Cc1c(-c2ccc(O)c(O)c2)oc2cc(O)cc(O)c2c1=O</chem>      |
| CNP0356234 | 0.7107 | 268.268 | 3.1796 | 4 | 2 | 1 | 70.67  | 3 | 0 | <chem>Cc1c(-c2ccccc2)oc2cc(O)cc(O)c2c1=O</chem>            |
| CNP0076419 | 0.7037 | 269.232 | 1.9448 | 5 | 2 | 1 | 93.73  | 3 | 0 | <chem>O=c1c(O)c(-c2ccccc2)oc2cc([O-])cc(O)c12</chem>       |
| CNP0167158 | 0.5352 | 316.265 | 2.291  | 7 | 4 | 2 | 120.36 | 3 | 1 | <chem>COc1cc(O)cc2oc(-c3ccc(O)c(O)c3)c(O)c(=O)c12</chem>   |
| CNP0145919 | 0.756  | 284.267 | 2.8798 | 5 | 2 | 2 | 79.9   | 3 | 0 | <chem>COc1cc(O)c2c(=O)cc(-c3ccc(O)cc3)oc2c1</chem>         |
| CNP0065787 | 0.6649 | 268.268 | 3.1796 | 4 | 2 | 1 | 70.67  | 3 | 1 | <chem>Cc1cc2oc(-c3ccccc3)cc(=O)c2c(O)c1O</chem>            |
| CNP0399551 | 0.5459 | 286.239 | 2.2824 | 6 | 4 | 1 | 111.13 | 3 | 0 | <chem>O=c1c(O)c(-c2ccccc2O)oc2cc(O)cc(O)c12</chem>         |
| CNP0291526 | 0.6723 | 300.266 | 2.5854 | 6 | 3 | 2 | 100.13 | 3 | 0 | <chem>COc1ccc(-c2oc3cc(O)cc(O)c3c(=O)c2O)cc1</chem>        |
| CNP0116129 | 0.756  | 284.267 | 2.8798 | 5 | 2 | 2 | 79.9   | 3 | 0 | <chem>COc1cc(O)c2c(=O)c(O)c(-c3ccccc3)oc2c1</chem>         |
| CNP0236338 | 0.6318 | 270.24  | 2.5768 | 5 | 3 | 1 | 90.9   | 3 | 0 | <chem>O=c1c(O)c(-c2ccccc2)oc2cc(O)cc(O)c12</chem>          |
| CNP0242521 | 0.7506 | 344.319 | 2.897  | 7 | 2 | 4 | 98.36  | 3 | 0 | <chem>COc1cc(O)c2c(=O)c(O)c(-c3ccc(OC)c(OC)c3)oc2c1</chem> |

|            |        |         |        |   |   |   |        |   |   |                                                           |
|------------|--------|---------|--------|---|---|---|--------|---|---|-----------------------------------------------------------|
| CNP0185958 | 0.6496 | 360.318 | 2.6026 | 8 | 3 | 4 | 118.59 | 3 | 0 | <chem>COc1cc(-c2oc3cc(OC)c(OC)c(O)c3c(=O)c2O)ccc1O</chem> |
| CNP0112748 | 0.5683 | 346.291 | 2.2996 | 8 | 4 | 3 | 129.59 | 3 | 0 | <chem>COc1cc(-c2oc3cc(O)c(OC)c(O)c3c(=O)c2O)ccc1O</chem>  |
| CNP0194512 | 0.7001 | 254.241 | 2.8712 | 4 | 2 | 1 | 70.67  | 3 | 0 | <chem>O=c1cc(-c2ccc(O)cc2)oc2cccc(O)c12</chem>            |
| CNP0269044 | 0.5459 | 286.239 | 2.2824 | 6 | 4 | 1 | 111.13 | 3 | 0 | <chem>O=c1cc(-c2cc(O)cc(O)c2)oc2cc(O)cc(O)c12</chem>      |
| CNP0376829 | 0.5459 | 286.239 | 2.2824 | 6 | 4 | 1 | 111.13 | 3 | 0 | <chem>O=c1cc(-c2ccc(O)cc2O)oc2cc(O)cc(O)c12</chem>        |
| CNP0287080 | 0.6318 | 270.24  | 2.5768 | 5 | 3 | 1 | 90.9   | 3 | 0 | <chem>O=c1cc(-c2cccc(O)c2)oc2cc(O)cc(O)c12</chem>         |
| CNP0110361 | 0.7506 | 344.319 | 2.897  | 7 | 2 | 4 | 98.36  | 3 | 0 | <chem>COc1ccc(-c2oc3cc(O)cc(OC)c3c(=O)c2O)cc1OC</chem>    |
| CNP0246782 | 0.6723 | 300.266 | 2.5854 | 6 | 3 | 2 | 100.13 | 3 | 0 | <chem>COc1ccc(-c2cc(=O)c3c(O)cc(O)cc3o2)cc1O</chem>       |
| CNP0223782 | 0.6723 | 300.266 | 2.5854 | 6 | 3 | 2 | 100.13 | 3 | 0 | <chem>COc1cc(-c2cc(=O)c3c(O)cc(O)cc3o2)ccc1O</chem>       |
| CNP0268505 | 0.6289 | 300.266 | 2.5854 | 6 | 3 | 2 | 100.13 | 3 | 1 | <chem>COc1cc(O)cc2oc(-c3ccc(O)c(O)c3)cc(=O)c12</chem>     |
| CNP0315728 | 0.5494 | 300.266 | 2.5908 | 6 | 4 | 1 | 111.13 | 3 | 0 | <chem>Cc1cc(-c2oc3cc(O)cc(O)c3c(=O)c2O)ccc1O</chem>       |
| CNP0280624 | 0.7001 | 254.241 | 2.8712 | 4 | 2 | 1 | 70.67  | 3 | 0 | <chem>O=c1cc(-c2cccc2)oc2cc(O)cc(O)c12</chem>             |
| CNP0194512 | 0.5911 | 270.24  | 2.5768 | 5 | 3 | 1 | 90.9   | 3 | 1 | <chem>O=c1cc(-c2ccc(O)c(O)c2)oc2cccc(O)c12</chem>         |
| CNP0205924 | 0.5106 | 286.239 | 2.2824 | 6 | 4 | 1 | 111.13 | 3 | 1 | <chem>O=c1cc(-c2cccc2O)oc2cc(O)c(O)c(O)c12</chem>         |
| CNP0241556 | 0.5106 | 286.239 | 2.2824 | 6 | 4 | 1 | 111.13 | 3 | 1 | <chem>O=c1c(O)c(-c2cccc2)oc2cc(O)c(O)c(O)c12</chem>       |
| CNP0192878 | 0.756  | 284.267 | 2.8798 | 5 | 2 | 2 | 79.9   | 3 | 0 | <chem>COc1c(O)cc2oc(-c3cccc3)cc(=O)c2c1O</chem>           |

|            |        |         |        |   |   |   |        |   |   |                                                           |
|------------|--------|---------|--------|---|---|---|--------|---|---|-----------------------------------------------------------|
| CNP0214218 | 0.6769 | 330.292 | 2.594  | 7 | 3 | 3 | 109.36 | 3 | 0 | <chem>COc1ccc(-c2oc3cc(O)cc(OC)c3c(=O)c2O)cc1O</chem>     |
| CNP0292859 | 0.6723 | 300.266 | 2.5854 | 6 | 3 | 2 | 100.13 | 3 | 0 | <chem>COc1cc(-c2oc3cc(O)ccc3c(=O)c2O)ccc1O</chem>         |
| CNP0105978 | 0.6769 | 330.292 | 2.594  | 7 | 3 | 3 | 109.36 | 3 | 0 | <chem>COc1cc(OC)cc(-c2oc3cc(O)cc(O)c3c(=O)c2O)c1</chem>   |
| CNP0279025 | 0.5683 | 346.291 | 2.2996 | 8 | 4 | 3 | 129.59 | 3 | 0 | <chem>COc1cc(-c2oc3cc(O)cc(O)c3c(=O)c2O)cc(OC)c1O</chem>  |
| CNP0115195 | 0.5352 | 316.265 | 2.291  | 7 | 4 | 2 | 120.36 | 3 | 1 | <chem>COc1c(-c2ccc(O)c(O)c2)oc2cc(O)cc(O)c2c1=O</chem>    |
| CNP0269649 | 0.5683 | 346.291 | 2.2996 | 8 | 4 | 3 | 129.59 | 3 | 0 | <chem>COc1cc(-c2oc3cc(O)cc(O)c3c(=O)c2O)c(OC)cc1O</chem>  |
| CNP0241196 | 0.67   | 344.319 | 2.9024 | 7 | 3 | 3 | 109.36 | 3 | 0 | <chem>COc1cc(-c2oc3cc(O)cc(O)c3c(=O)c2O)cc(C)c1OC</chem>  |
| CNP0076076 | 0.626  | 285.231 | 1.6504 | 6 | 3 | 1 | 113.96 | 3 | 0 | <chem>O=c1c(O)c(-c2ccc([O-])cc2)oc2cc(O)cc(O)c12</chem>   |
| CNP0219017 | 0.5459 | 286.239 | 2.2824 | 6 | 4 | 1 | 111.13 | 3 | 0 | <chem>O=c1c(O)c(-c2cccc(O)c2)oc2cc(O)cc(O)c12</chem>      |
| CNP0145877 | 0.756  | 284.267 | 2.8798 | 5 | 2 | 2 | 79.9   | 3 | 0 | <chem>COc1cc(O)cc2oc(-c3ccccc3)c(O)c(=O)c12</chem>        |
| CNP0199169 | 0.756  | 284.267 | 2.8798 | 5 | 2 | 2 | 79.9   | 3 | 0 | <chem>COc1c(-c2ccccc2)oc2cc(O)cc(O)c2c1=O</chem>          |
| CNP0124637 | 0.7506 | 344.319 | 2.897  | 7 | 2 | 4 | 98.36  | 3 | 0 | <chem>COc1cc(-c2oc3cc(O)cc(OC)c3c(=O)c2OC)ccc1O</chem>    |
| CNP0298914 | 0.7506 | 344.319 | 2.897  | 7 | 2 | 4 | 98.36  | 3 | 0 | <chem>COc1ccc(-c2oc3cc(O)cc(O)c3c(=O)c2OC)cc1OC</chem>    |
| CNP0293671 | 0.6769 | 330.292 | 2.594  | 7 | 3 | 3 | 109.36 | 3 | 0 | <chem>COc1cc(O)c2c(=O)c(O)c(-c3ccc(OC)c(O)c3)oc2c1</chem> |
| CNP0391817 | 0.5106 | 286.239 | 2.2824 | 6 | 4 | 1 | 111.13 | 3 | 1 | <chem>O=c1cc(-c2cc(O)ccc2O)oc2cc(O)cc(O)c12</chem>        |

|            |        |         |        |   |   |   |        |   |   |                                                   |
|------------|--------|---------|--------|---|---|---|--------|---|---|---------------------------------------------------|
| CNP0325061 | 0.7072 | 284.267 | 2.8798 | 5 | 2 | 2 | 79.9   | 3 | 1 | COc1cc2oc(-c3ccccc3)cc(=O)c2c(O)c1O               |
| CNP0228332 | 0.6289 | 300.266 | 2.5854 | 6 | 3 | 2 | 100.13 | 3 | 1 | COc1ccc(-<br>c2cc(=O)c3c(O)c(O)c(O)cc3o2)cc1      |
| CNP0304229 | 0.573  | 278.263 | 3.9118 | 4 | 1 | 1 | 63.58  | 4 | 0 | O=c1cc(-c2ccccc2)oc2cc3ccoc3c(O)c12               |
| CNP0266609 | 0.6723 | 300.266 | 2.5854 | 6 | 3 | 2 | 100.13 | 3 | 0 | COc1ccccc1-c1oc2cc(O)cc(O)c2c(=O)c1O              |
| CNP0113555 | 0.5721 | 316.265 | 2.291  | 7 | 4 | 2 | 120.36 | 3 | 0 | COc1cc(O)ccc1-<br>c1oc2cc(O)cc(O)c2c(=O)c1O       |
| CNP0330206 | 0.5352 | 316.265 | 2.291  | 7 | 4 | 2 | 120.36 | 3 | 1 | COc1cc(O)c2c(=O)c(O)c(-<br>c3ccc(O)c(O)c3)oc2c1   |
| CNP0179264 | 0.708  | 238.242 | 3.1656 | 3 | 1 | 1 | 50.44  | 3 | 0 | O=c1cc(-c2ccccc2)oc2cccc(O)c12                    |
| CNP0266076 | 0.756  | 284.267 | 2.8798 | 5 | 2 | 2 | 79.9   | 3 | 0 | COc1cc(O)cc2oc(-c3ccc(O)cc3)cc(=O)c12             |
| CNP0184323 | 0.7725 | 314.293 | 2.8884 | 6 | 2 | 3 | 89.13  | 3 | 0 | COc1ccc(-<br>c2cc(=O)c3c(O)cc(O)cc3o2)cc1OC       |
| CNP0229255 | 0.7175 | 298.25  | 2.5999 | 6 | 2 | 1 | 89.13  | 3 | 0 | O=c1cc(-<br>c2ccc3c(c2)OCO3)oc2cc(O)cc(O)c12      |
| CNP0120950 | 0.5683 | 346.291 | 2.2996 | 8 | 4 | 3 | 129.59 | 3 | 0 | COc1cc(-<br>c2oc3cc(O)cc(O)c3c(=O)c2O)cc(O)c1OC   |
| CNP0300748 | 0.6723 | 300.266 | 2.5854 | 6 | 3 | 2 | 100.13 | 3 | 0 | COc1cc(O)cc2oc(-<br>c3ccc(O)cc3)c(O)c(=O)c12      |
| CNP0425896 | 0.6496 | 360.318 | 2.6026 | 8 | 3 | 4 | 118.59 | 3 | 0 | COc1cc(OC)c(-<br>c2oc3cc(O)cc(O)c3c(=O)c2O)cc1OC  |
| CNP0048956 | 0.5798 | 342.347 | 3.4809 | 6 | 4 | 3 | 111.13 | 3 | 0 | CC(C)Cc1cc(-<br>c2oc3cc(O)cc(O)c3c(=O)c2O)ccc1O   |
| CNP0392086 | 0.7506 | 344.319 | 2.897  | 7 | 2 | 4 | 98.36  | 3 | 0 | COc1cc(O)c2c(=O)c(OC)c(-<br>c3ccc(O)c(OC)c3)oc2c1 |
| CNP0248340 | 0.756  | 284.267 | 2.8798 | 5 | 2 | 2 | 79.9   | 3 | 0 | COc1ccc(-c2cc(=O)c3c(O)cc(O)cc3o2)cc1             |

|            |        |         |        |   |   |   |        |   |   |                                                  |
|------------|--------|---------|--------|---|---|---|--------|---|---|--------------------------------------------------|
| CNP0322103 | 0.6496 | 360.318 | 2.6026 | 8 | 3 | 4 | 118.59 | 3 | 0 | COc1cc(-<br>c2oc3cc(O)cc(O)c3c(=O)c2O)cc(OC)c1OC |
|------------|--------|---------|--------|---|---|---|--------|---|---|--------------------------------------------------|

---

**Table S3.** Drug similarity prediction of natural products based on Lipinski, Veber and Egan rules.

| <b>Compounds</b> | <b>Lipinski rule</b> | <b>Ghose rule</b> | <b>Veber rule</b> | <b>Egan rule</b> | <b>Muegge rule</b> |
|------------------|----------------------|-------------------|-------------------|------------------|--------------------|
| CNP0269044       | Yes                  | Yes               | Yes               | Yes              | Yes                |
| CNP0376829       | Yes                  | Yes               | Yes               | Yes              | Yes                |
| CNP0391817       | Yes                  | Yes               | Yes               | Yes              | Yes                |
| CNP0194512       | Yes                  | Yes               | Yes               | Yes              | Yes                |
| CNP0105978       | Yes                  | Yes               | Yes               | Yes              | Yes                |
